# Supplementary material for: The importance of standardization for biodiversity comparisons: A case study using autonomous reef monitoring structures (ARMS) and metabarcoding to measure cryptic diversity on Mo’orea coral reefs, French Polynesia
Source: PubMed Central journal article supplement (PMC5400227; doi:10.1371/journal.pone.0175066), 2017-04-21
Supplement: pone.0175066.s011.pdf [file pone.0175066.s011.pdf]

**S5 Table. PERMANOVA for sessile processing experiment (OTU data).**

| <b>Abundance Data</b>     | <b>Pseudo-F</b> | <b>P</b>     |
|---------------------------|-----------------|--------------|
| ARMS                      | <b>5.03</b>     | <b>0.001</b> |
| Processing                | 3.79            | 0.001        |
| Preservation              | 3.12            | 0.001        |
| ARMS x Processing         | 1.98            | 0.001        |
| ARMS x Preservation       | 1.16            | 0.136        |
| Processing x Preservation | 1.27            | 0.006        |

  

| <b>Abundance Data (void of immediately extracted samples)</b> | <b>Pseudo-F</b> | <b>P</b>     |
|---------------------------------------------------------------|-----------------|--------------|
| ARMS                                                          | <b>5.05</b>     | <b>0.001</b> |
| Processing                                                    | 3.77            | 0.001        |
| Preservation                                                  | 2.61            | 0.002        |
| ARMS x Processing                                             | 1.95            | 0.001        |
| ARMS x Preservation                                           | 1.39            | 0.04         |
| Processing x Preservation                                     | 1.37            | 0.02         |

  

| <b>Richness Data</b>                               | <b>Pseudo-F</b> | <b>P</b>     |
|----------------------------------------------------|-----------------|--------------|
| ARMS                                               | <b>2.47</b>     | <b>0.001</b> |
| Processing                                         | 2.05            | 0.002        |
| Preservation                                       | 1.49            | 0.01         |
| ARMS x Processing                                  | 1.32            | 0.006        |
| ARMS x Preservation                                | 1.08            | 0.253        |
| Processing x Preservation                          | 1.08            | 0.156        |
| Processing (void of immediately extracted samples) | 1.78            | 0.002        |
