# Supplementary material for: The importance of standardization for biodiversity comparisons: A case study using autonomous reef monitoring structures (ARMS) and metabarcoding to measure cryptic diversity on Mo’orea coral reefs, French Polynesia
Source: PubMed Central journal article supplement (PMC5400227; doi:10.1371/journal.pone.0175066), 2017-04-21
Supplement: pone.0175066.s013.pdf [file pone.0175066.s013.pdf]

**S7 Table. Diversity data for sessile processing experiment, showing number of OTUs (S), species richness (Margalef; d), Pielou's evenness (J'), and Shannon diversity (H').**

Based on rarefied abundance data (n=5899), void of singletons.

| ARMS | Processing Method | Preservation Method | S   | d     | J'     | H' (log <sub>e</sub> ) |
|------|-------------------|---------------------|-----|-------|--------|------------------------|
| 1    | SWET              | EtOH                | 275 | 31.56 | 0.606  | 3.404                  |
| 2    | SWET              | EtOH                | 183 | 20.96 | 0.5561 | 2.897                  |
| 3    | SWET              | EtOH                | 175 | 20.04 | 0.5164 | 2.667                  |
| 1    | SWET              | DMSO                | 260 | 29.83 | 0.5716 | 3.179                  |
| 2    | SWET              | DMSO                | 253 | 29.02 | 0.5831 | 3.227                  |
| 3    | SWET              | DMSO                | 308 | 35.36 | 0.5659 | 3.242                  |
| 1    | SWET              | RNAlater            | 211 | 24.19 | 0.5935 | 3.176                  |
| 2    | SWET              | RNAlater            | 226 | 25.91 | 0.6135 | 3.326                  |
| 3    | SWET              | RNAlater            | 238 | 27.3  | 0.635  | 3.475                  |
| 1    | SWET              | Immediate Extract   | 210 | 24.07 | 0.542  | 2.898                  |
| 2    | SWET              | Immediate Extract   | 327 | 37.55 | 0.658  | 3.81                   |
| 3    | SWET              | Immediate Extract   | 168 | 19.23 | 0.5274 | 2.702                  |
| 1    | KEW               | EtOH                | 257 | 29.48 | 0.6072 | 3.369                  |
| 2    | KEW               | EtOH                | 196 | 22.46 | 0.6042 | 3.189                  |
| 3    | KEW               | EtOH                | 162 | 18.54 | 0.4456 | 2.267                  |
| 1    | KEW               | DMSO                | 200 | 22.92 | 0.528  | 2.798                  |
| 2    | KEW               | DMSO                | 162 | 18.54 | 0.5914 | 3.009                  |
| 3    | KEW               | DMSO                | 255 | 29.25 | 0.5215 | 2.89                   |
| 1    | KEW               | RNAlater            | 215 | 24.65 | 0.555  | 2.981                  |
| 2    | KEW               | RNAlater            | 234 | 26.84 | 0.5849 | 3.191                  |
| 3    | KEW               | RNAlater            | 243 | 27.87 | 0.5945 | 3.265                  |
| 1    | KEW               | Immediate Extract   | 208 | 23.84 | 0.5272 | 2.814                  |
| 2    | KEW               | Immediate Extract   | 188 | 21.54 | 0.4759 | 2.492                  |
| 3    | KEW               | Immediate Extract   | 344 | 39.5  | 0.6705 | 3.916                  |
| 2    | MILL              | EtOH                | 169 | 19.35 | 0.5543 | 2.844                  |
| 3    | MILL              | EtOH                | 101 | 11.52 | 0.6101 | 2.816                  |
| 1    | MILL              | DMSO                | 211 | 24.19 | 0.4969 | 2.66                   |
| 2    | MILL              | DMSO                | 200 | 22.92 | 0.5526 | 2.928                  |
| 3    | MILL              | DMSO                | 143 | 16.35 | 0.5362 | 2.661                  |
| 1    | MILL              | RNAlater            | 210 | 24.07 | 0.5177 | 2.768                  |
| 2    | MILL              | RNAlater            | 164 | 18.77 | 0.5465 | 2.787                  |
| 3    | MILL              | RNAlater            | 183 | 20.96 | 0.5814 | 3.029                  |
| 1    | MILL              | Immediate Extract   | 205 | 23.5  | 0.5009 | 2.666                  |
| 2    | MILL              | Immediate Extract   | 226 | 25.91 | 0.5642 | 3.058                  |
| 3    | MILL              | Immediate Extract   | 140 | 16.01 | 0.5627 | 2.781                  |
| 1    | NOAA              | EtOH                | 420 | 48.26 | 0.6266 | 3.785                  |
| 2    | NOAA              | EtOH                | 239 | 27.41 | 0.6414 | 3.513                  |
| 3    | NOAA              | EtOH                | 280 | 32.13 | 0.6236 | 3.514                  |
| 1    | NOAA              | DMSO                | 256 | 29.37 | 0.5405 | 2.997                  |
| 2    | NOAA              | DMSO                | 277 | 31.79 | 0.6108 | 3.435                  |
| 3    | NOAA              | DMSO                | 331 | 38.01 | 0.6193 | 3.594                  |
| 1    | NOAA              | RNAlater            | 232 | 26.61 | 0.5151 | 2.806                  |
| 2    | NOAA              | RNAlater            | 212 | 24.3  | 0.6137 | 3.287                  |
| 3    | NOAA              | RNAlater            | 246 | 28.22 | 0.6737 | 3.709                  |
| 1    | NOAA              | Immediate Extract   | 388 | 44.57 | 0.6097 | 3.634                  |
| 2    | NOAA              | Immediate Extract   | 352 | 40.43 | 0.6131 | 3.595                  |
| 3    | NOAA              | Immediate Extract   | 437 | 50.22 | 0.6468 | 3.932                  |
